# Supplementary material for: Selective inhibitors of a PAF biosynthetic enzyme lysophosphatidylcholine acyltransferase 2
Source: PubMed Central journal article supplement (PMC4076079; doi:10.1194/jlr.m049205), 2014-07
Supplement: supp_M049205_jlr.M049205-1.pdf [file supp_M049205_jlr.M049205-1.pdf]

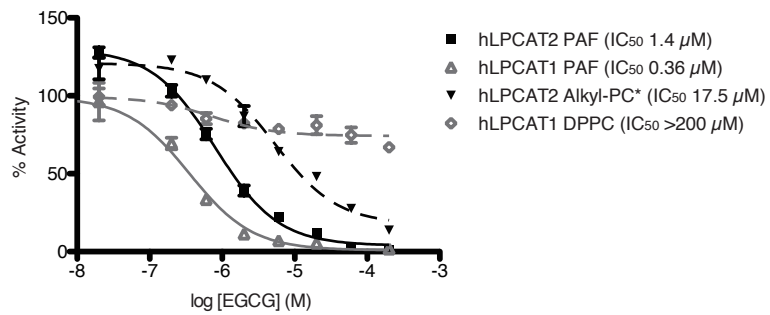

**Supplementary Fig. 1. EGCG effects on enzymatic activity**

Microsomal fractions of CHO-S-PAFR cells were analyzed in acetyltransferase and acyltransferase activity assays performed with the indicated EGCG concentrations.

EGCG demonstrated lower IC<sub>50</sub> for hLPCAT1 than for hLPCAT2 lyso-PAFAT activity.

The data represent the mean  $\pm$  SD of triplicate measurements. Two independent experiments were performed with similar results.
