# Supplementary material for: Selective inhibitors of a PAF biosynthetic enzyme lysophosphatidylcholine acyltransferase 2
Source: PubMed Central journal article supplement (PMC4076079; doi:10.1194/jlr.m049205), 2014-07
Supplement: supp_M049205_jlr.M049205-2.pdf [file supp_M049205_jlr.M049205-2.pdf]

## Supplementary Methods

### *Compounds*

The following compounds were obtained from the commercial vendors indicated below and used without further purification.

TSI-01 (propan-2-yl 4-(3,4-dichloro-2,5-dioxopyrrol-1-yl)benzoate, # 7014760174),

TSI-03 (3,4-dichloro-1-(5-chloro-2-methoxyphenyl)pyrrole-2,5-dione, # 7010240078),

TSI-04 (3-chloro-1-(5-chloro-2-methoxyphenyl)-4-(2-hydroxyanilino)pyrrole-2,5-dione, # 7010670108) were from OTAVA.

TSI-05 (3-chloro-4-(2-methoxyphenoxy)-1-(4-methoxyphenyl)pyrrole-2,5-dione, # 7185200) was from ChemBridge.

TSI-06 (propan-2-yl 4-(3-chloro-4-morpholin-4-yl-2,5-dioxopyrrol-1-yl)benzoate, #

F3098-7984) and TSI-07 (propan-2-yl

4-[3-chloro-4-(2-hydroxyanilino)-2,5-dioxopyrrol-1-yl]benzoate, # F3098-7985) were from

LifeChemicals.,

TSI-08 (methyl 4-[3-chloro-2,5-dioxo-4-(4-sulfamoylanilino)pyrrol-1-yl]benzoate, #

7015101744) TSI-09 (methyl 4-(3,4-dichloro-2,5-dioxopyrrol-1-yl)benzoate, #

7013910733) TSI-10 (propyl 4-(3,4-dichloro-2,5-dioxopyrrol-1-yl)benzoate, #

7014760173), and TSI-11 (butyl 4-(3,4-dichloro-2,5-dioxopyrrol-1-yl)benzoate, # 7014760172) were from OTAVA.

TSI-02 (3-chloro-4-morpholin-4-yl-1-(4-phenoxyphenyl)pyrrole-2,5-dione) was synthesized as follows: To a solution of *N*-phenoxyphenyldichloromaleimide (1) (1.5 g, 4.5 mmol) in 25 ml of dichloromethane was added morpholine (782 mg, 9.0 mmol) in 2 ml of dichloromethane, and stirred for 1 h at room temperature. The reaction mixture was concentrated and separated on a silica gel column chromatography using hexane-ethyl acetate (80:20) to give TSI-02 (155mg, 9.5% yield). LC-MS (ESI)  $m/z$  385.4 ( $[M + H]^+$ );  $^1H$  NMR (DMSO- $d_6$ ):  $\delta$  3.72-3.75 (4H, m), 3.91-3.94 (4H, m), 7.05-7.09 (4H, m), 7.19 (1H, t,  $J = 7.1$  Hz), 7.31 (2H, d,  $J = 8.7$  Hz), 7.40-7.46 (2H, m).

### ***Steps 2 to 5 screening: 96-well plate assay***

Acetyltransferase and acyltransferase assays were developed in 96-well plates. The microsomal hLPCAT2, obtained from mcPAF-stimulated CHO-S-PAFR cells was used in steps 1, 2, and 5. The microsomal hLPCAT1 obtained from unstimulated CHO-S cells was used in steps 3 to 5. Each well of the 96-well plates contained 30  $\mu$ l of 15  $\mu$ g/ml protein, 600 nl of 2 mM compound, 30  $\mu$ l buffer C, and two substrates (Fig. 1B and C). Substrate concentrations were as follows: acetyl-CoA, 250 or 1000  $\mu$ M acetyl-CoA;

arachidonoyl-CoA, 5  $\mu$ M; palmitoyl-CoA, 5  $\mu$ M; d<sub>4</sub>-lyso-PAF, 5  $\mu$ M; and d<sub>31</sub>-LPC, 5  $\mu$ M.

For step 5, compound concentrations were 0, 0.167, 0.67, 2, 6.7, and 20  $\mu$ M. The deuterium-labeled products were measured by LC-MS/MS. Percentage inhibition (steps 2 to 4) or IC<sub>50</sub> (step 5) was used as the hit criterion.

***Step 6 screening: BSA assay***

The acetyltransferase assay was performed with 20  $\mu$ M of each compound and microsomal hLPCAT2 from step 1. The assay mixture contained 0.4% BSA and two substrates for lyso-PAFAT activity: 1 mM acetyl-CoA and 5  $\mu$ M d<sub>4</sub>-lyso-PAF. Percentage inhibition values were determined.

***Step 7 screening: species-specific differences***

To evaluate the effects on the activity of mouse or human LPCAT1 and LPCAT2, each microsomal fraction was obtained using CHO-S-PAFR cells with or without mcPAF (200 nM) stimulation for 5 min. Acetyltransferase and acyltransferase assays were performed with 20  $\mu$ M of each compound. Percentage inhibition was calculated in each assay.

### ***Step 8 screening: cell viability assay***

Wild-type RAW264.7 cells and RAW264.7 cells transfected with mLPCAT2 or control plasmid were used. Cells were cultured for 36 h with 0, 0.06, 0.2, 0.6, 2, 6, and 20  $\mu\text{M}$  of compounds in 96-well plates and assayed for viability with WST-8.

### ***Step 9 screening: cell-based assay***

RAW-mLPCAT2 cells were treated with compounds for 1 h and analyzed after 5 min stimulation with A23187. The assays were performed with 0, 0.2, 0.6, 20, and 50 or 60  $\mu\text{M}$  of compound. PAF concentration was measured by LC-MS/MS.

### ***Data analysis***

The data were normalized to each positive control (100% activation). Percentage inhibition or  $\text{IC}_{50}$  were determined in each screening step. To assess screening quality, the percentage coefficient of variance and the  $Z'$  factor was calculated for each plate or each assay as described previously (2).

## References

1. Relles HM & Schluenz RW. 1972. Dichloromaleimide chemistry. I. Substituent effects on carbon-13 nuclear magnetic resonance and mass spectra. *J Org Chem* **37**: 1742–1745.
2. Chung, C. C., K. Ohwaki, J. E. Schneeweis, E. Stec, J. P. Varnerin, P. N. Goudreau, A. Chang, J. Cassaday, L. Yang, T. Yamakawa, O. Kornienko, P. Hodder, J. Inglese, M. Ferrer, B. Strulovici, J. Kusunoki, M. R. Tota, and T. Takagi. 2008. A fluorescence-based thiol quantification assay for ultra-high-throughput screening for inhibitors of coenzyme A production. *Assay Drug Dev Technol* **6**: 361-374.
